# Supplementary material for: A Pseudomonas aeruginosa type VI secretion system regulated by CueR facilitates copper acquisition
Source: PubMed Central journal article supplement (PMC6907878; doi:10.1371/journal.ppat.1008198), 2019-12-02
Supplement: ppat.1008198.s001.pdf [file ppat.1008198.s001.pdf]

**S1 Table. Proteins identified in the supernatant of PAO1,  $\Delta retS$  and  $\Delta retS\Delta clpV2$  strains.**

| Protein ID | Protein_Description                                  | Group A           |               |                                 |                                         | Group B           |               |                                 |                                         | Average Rate <sup>#</sup> |
|------------|------------------------------------------------------|-------------------|---------------|---------------------------------|-----------------------------------------|-------------------|---------------|---------------------------------|-----------------------------------------|---------------------------|
|            |                                                      | Sequence coverage |               |                                 | Rate*                                   | Sequence coverage |               |                                 | Rate*                                   |                           |
|            |                                                      | PAO1              | $\Delta retS$ | $\Delta retS$<br>$\Delta clpV2$ | $(\Delta retS\Delta clpV2/\Delta retS)$ | PAO1              | $\Delta retS$ | $\Delta retS$<br>$\Delta clpV2$ | $(\Delta retS\Delta clpV2/\Delta retS)$ |                           |
| PA0260     | Tle3                                                 |                   | 75            | 2                               | 0.027                                   |                   | 25            |                                 | 0                                       | 0.014                     |
| PA0261     | Hypothetical protein                                 |                   | 22            | 2                               | 0.091                                   | 7                 | 56            | 10                              | 0.179                                   | 0.135                     |
| PA0262     | VgrG2b                                               |                   | 118           |                                 | 0                                       |                   | 155           |                                 | 0                                       | 0                         |
| PA0263     | Secreted protein Hcp                                 | 23                | 512           | 6                               | 0.012                                   | 13                | 836           | 37                              | 0.044                                   | 0.028                     |
| PA0423     | PasP                                                 | 98                | 200           | 93                              | 0.465                                   | 50                | 144           | 69                              | 0.479                                   | 0.472                     |
| PA0604     | AgtB                                                 |                   | 2             |                                 | 0                                       | 3                 | 35            | 2                               | 0.057                                   | 0.029                     |
| PA0807     | AmpDh3                                               | 27                | 31            | 11                              | 0.355                                   | 15                | 43            | 9                               | 0.209                                   | 0.282                     |
| PA0888     | Arginine/ornithine binding protein AotJ              | 21                | 67            | 18                              | 0.269                                   | 37                | 105           | 30                              | 0.286                                   | 0.278                     |
| PA1510     | Tle4                                                 |                   | 46            |                                 | 0                                       |                   | 12            |                                 | 0                                       | 0                         |
| PA1511     | VgrG2a                                               |                   | 109           |                                 | 0                                       |                   | 178           |                                 | 0                                       | 0                         |
| PA1639     | Hypothetical protein                                 |                   | 11            | 3                               | 0.273                                   |                   | 50            | 22                              | 0.440                                   | 0.357                     |
| PA1863     | Molybdate-binding periplasmic protein precursor ModA | 3                 | 78            | 24                              | 0.308                                   | 39                | 118           | 28                              | 0.237                                   | 0.273                     |
| PA2328     | Hypothetical protein                                 |                   | 2             |                                 | 0                                       |                   | 14            | 3                               | 0.214                                   | 0.107                     |
| PA2395     | PvdO                                                 | 23                | 55            | 27                              | 0.491                                   | 30                | 167           | 80                              | 0.479                                   | 0.485                     |
| PA2464     | Hypothetical protein                                 |                   | 55            | 20                              | 0.364                                   | 6                 | 55            | 25                              | 0.455                                   | 0.410                     |
| PA2592     | Spermidine/putrescine-binding protein                |                   | 5             | 2                               | 0.400                                   |                   | 19            | 8                               | 0.421                                   | 0.411                     |
| PA2856     | Lysophospholipase A                                  |                   | 11            | 5                               | 0.455                                   | 6                 | 18            | 6                               | 0.333                                   | 0.394                     |
| PA3313     | Hypothetical protein                                 | 23                | 60            | 27                              | 0.450                                   | 73                | 179           | 71                              | 0.397                                   | 0.424                     |
| PA3487     | Tle5                                                 | 17                | 527           | 14                              | 0.027                                   | 15                | 636           | 35                              | 0.055                                   | 0.041                     |
| PA4922     | Azurin precursor                                     | 14                | 279           | 81                              | 0.290                                   | 13                | 201           | 48                              | 0.239                                   | 0.265                     |
| PA5498     | Probable adhesin                                     |                   | 9             | 2                               | 0.222                                   | 1                 | 10            | 1                               | 0.100                                   | 0.161                     |

\*:  $Rate(\Delta retS\Delta clpV2/\Delta retS)$ ,

#: Average Rate < 0.5
