# Supplementary material for: A Pseudomonas aeruginosa type VI secretion system regulated by CueR facilitates copper acquisition
Source: PubMed Central journal article supplement (PMC6907878; doi:10.1371/journal.ppat.1008198), 2019-12-02
Supplement: ppat.1008198.s002.pdf [file ppat.1008198.s002.pdf]

**S2 Table. binding proteins were identified by pull-down assays.**

| <b>Protein ID</b> | <b>Protein Description</b>                                    | <b>Sequence coverage*</b> |
|-------------------|---------------------------------------------------------------|---------------------------|
| PA3790            | Putative copper transport outer membrane porin OprC precursor | 172                       |
| PA0588            | Conserved hypothetical protein                                | 31                        |
| PA1596            | Heat shock protein HtpG                                       | 16                        |
| PA4265            | Elongation factor Tu                                          | 12                        |
| PA0688            | Low-molecular-weight alkaline phosphatase A, LapA             | 10                        |

\*: **Sequence coverage > 10.**
