# Supplementary material for: A Pseudomonas aeruginosa type VI secretion system regulated by CueR facilitates copper acquisition
Source: PubMed Central journal article supplement (PMC6907878; doi:10.1371/journal.ppat.1008198), 2019-12-02
Supplement: ppat.1008198.s003.pdf [file ppat.1008198.s003.pdf]

**S3 Table.** Bacterial strains and plasmids used in this study.

| Strain or plasmid                            | Relevant characteristics                                                                                                                                                                                              | Source     |
|----------------------------------------------|-----------------------------------------------------------------------------------------------------------------------------------------------------------------------------------------------------------------------|------------|
| <b><i>E. coli</i></b>                        |                                                                                                                                                                                                                       |            |
| DH5 $\alpha$                                 | <i>F</i> <sup>-</sup> $\phi$ 80 <i>lacZ</i> $\Delta$ M15 $\Delta$ ( <i>lacZYA-argF</i> )U169 <i>recA1 endA1 hsdR17</i> ( <i>rk</i> <sup>-</sup> , <i>mk</i> <sup>+</sup> ) <i>phoA supE44 thi-1 gyrA96 relA1 tonA</i> | Stratagene |
| BL21 (DE3)                                   | <i>F</i> <sup>-</sup> <i>ompT hsdS<sub>B</sub></i> ( <i>rB</i> <sup>-</sup> <i>mB</i> <sup>-</sup> ) <i>gal dcm met</i> (DE3)                                                                                         | Invitrogen |
| <b><i>P. aeruginosa</i></b>                  |                                                                                                                                                                                                                       |            |
| PAO1                                         | Wild type                                                                                                                                                                                                             | This lab   |
| $\Delta$ <i>retS</i>                         | <i>retS</i> deletion mutant of PAO1                                                                                                                                                                                   | This lab   |
| $\Delta$ <i>retS</i> $\Delta$ <i>clpV2</i>   | <i>retSclpV2</i> deletion mutant of PAO1                                                                                                                                                                              | This study |
| $\Delta$ <i>retS</i> $\Delta$ <i>hcp2</i>    | <i>retShcp2</i> deletion mutant of PAO1                                                                                                                                                                               | This study |
| $\Delta$ <i>retS</i> $\Delta$ <i>tssM2</i>   | <i>retStssM2</i> deletion mutant of PAO1                                                                                                                                                                              | This study |
| $\Delta$ <i>retS</i> $\Delta$ <i>svgrG2a</i> | <i>retSvgrG2a</i> deletion mutant of PAO1                                                                                                                                                                             | This study |
| $\Delta$ <i>retS</i> $\Delta$ <i>svgrG2b</i> | <i>retSvgrG2b</i> deletion mutant of PAO1                                                                                                                                                                             | This study |
| $\Delta$ <i>retS</i> $\Delta$ <i>clpV1</i>   | <i>retSclpV1</i> deletion mutant of PAO1                                                                                                                                                                              | This study |
| $\Delta$ <i>retS</i> $\Delta$ <i>clpV3</i>   | <i>retSclpV3</i> deletion mutant of PAO1                                                                                                                                                                              | This study |
| $\Delta$ <i>retS</i> $\Delta$ <i>clpV123</i> | <i>retSclpV1clpV2clpV3</i> deletion mutant of PAO1                                                                                                                                                                    | This study |
| $\Delta$ <i>clpV2</i>                        | <i>clpV2</i> deletion mutant of PAO1                                                                                                                                                                                  | This study |
| $\Delta$ <i>azu</i>                          | <i>azu</i> deletion mutant of PAO1                                                                                                                                                                                    | This study |
| $\Delta$ <i>oprC</i>                         | <i>oprC</i> deletion mutant of PAO1                                                                                                                                                                                   | This study |
| $\Delta$ <i>cueR</i>                         | <i>cueR</i> deletion mutant of PAO1                                                                                                                                                                                   | This study |
| $\Delta$ <i>cueR</i> $\Delta$ <i>clpV2</i>   | <i>cueRclpV2</i> deletion mutant of PAO1                                                                                                                                                                              | This study |
| <b>Plasmids</b>                              |                                                                                                                                                                                                                       |            |
| pET28a                                       | T7 <i>lac</i> promoter-operator, N-terminal His tag, Kan <sup>r</sup>                                                                                                                                                 | Novagen    |
| pGEX6p-1                                     | Expression vector with N-terminal GST tag, Ap <sup>r</sup>                                                                                                                                                            | Novagen    |
| pEX18Ap                                      | <i>oriT</i> <sup>+</sup> <i>sacB</i> <sup>+</sup> gene replacement vector with multiple-cloning site from pUC18; Ap <sup>r</sup>                                                                                      | 1          |
| pAK1900                                      | <i>E. coli-P. aeruginosa</i> shuttle cloning vector carrying <i>plac</i> upstream of MCS; Ap <sup>r</sup> , Cb <sup>r</sup>                                                                                           | 2          |
| mini-CTX- <i>lacZ</i>                        | Integration plasmid; Tc <sup>r</sup>                                                                                                                                                                                  | 3          |
| pMMB67H                                      | <i>E. coli-P. aeruginosa</i> shuttle cloning vector; Ap <sup>r</sup> , Cb <sup>r</sup>                                                                                                                                | 4          |
| pUCp26                                       | <i>E. coli-P. aeruginosa</i> shuttle cloning vector; Tc <sup>r</sup>                                                                                                                                                  | 5          |
| pET28a- <i>oprC</i>                          | Protein expression construct, the entire gene of <i>oprC</i> cloned in pET28a vector                                                                                                                                  | This study |
| pGEX6p-1- <i>azu</i>                         | Protein expression construct, the entire gene of <i>azu</i> cloned in pGEX-6p-1 vector                                                                                                                                | This study |
| pGEX6p-1- <i>cueR</i>                        | Protein expression construct, the entire gene of <i>cueR</i> cloned in pGEX-6p-1 vector                                                                                                                               | This study |
| pEX- <i>clpV2</i>                            | <i>clpV2</i> deletion plasmid, pEX18Ap with upstream and downstream region of <i>clpV2</i> ; Ap <sup>r</sup>                                                                                                          | This study |
| pEX- <i>hcp2</i>                             | <i>hcp2</i> deletion plasmid, pEX18Ap with upstream and downstream region of <i>hcp2</i> ; Ap <sup>r</sup>                                                                                                            | This study |
| pEX- <i>tssM2</i>                            | <i>tssM2</i> deletion plasmid, pEX18Ap with upstream region and                                                                                                                                                       | This study |

|                                         |                                                                                                                                                                     |            |
|-----------------------------------------|---------------------------------------------------------------------------------------------------------------------------------------------------------------------|------------|
| pEX- <i>clpV1</i>                       | downstream region of <i>tssM2</i> ; Ap <sup>r</sup><br><i>ClpV1</i> deletion plasmid, pEX18Ap with upstream and downstream region of <i>clpV1</i> ; Ap <sup>r</sup> | This study |
| pEX- <i>clpV3</i>                       | <i>clpV3</i> deletion plasmid, pEX18Ap with upstream and downstream region of <i>clpV3</i> ; Ap <sup>r</sup>                                                        | This study |
| pEX- <i>vgrG2a</i>                      | <i>VgrG2a</i> deletion plasmid, pEX18Ap with upstream and downstream region of <i>clpV3</i> ; Ap <sup>r</sup>                                                       | This study |
| pEX- <i>vgrG2b</i>                      | <i>vgrG2b</i> deletion plasmid, pEX18Ap with upstream and downstream region of <i>clpV3</i> ; Ap <sup>r</sup>                                                       | This study |
| pEX- <i>azu</i>                         | <i>azu</i> deletion plasmid, pEX18Ap with upstream and downstream region of <i>azu</i> ; Ap <sup>r</sup>                                                            | This study |
| pEX- <i>oprC</i>                        | <i>oprC</i> deletion plasmid, pEX18Ap with upstream and downstream of <i>oprC</i> ; Ap <sup>r</sup>                                                                 | This study |
| mini-CTX- <i>oprC</i>                   | Expression plasmid, mini-CTX- <i>lacZ</i> containing the entire <i>oprC</i> gene; Tc <sup>r</sup>                                                                   | This study |
| mini-CTX- <i>hcp2</i> -Flag             | Expression plasmid, mini-CTX- <i>lacZ</i> containing the entire <i>hcp2</i> gene and the 3x <i>flag</i> sequence; Tc <sup>r</sup>                                   | This study |
| mini-CTX- <i>oprC</i> -Flag             | Expression plasmid, mini-CTX- <i>lacZ</i> containing the entire <i>oprC</i> gene and the 3x <i>flag</i> sequence; Tc <sup>r</sup>                                   | This study |
| mini-CTX- <i>azu</i> -Flag              | Expression plasmid, mini-CTX- <i>lacZ</i> containing the entire <i>azu</i> gene and the 3x <i>flag</i> sequence; Tc <sup>r</sup>                                    | This study |
| mini-CTX- <i>azu<sub>ss</sub></i> -Flag | Expression plasmid, mini-CTX- <i>lacZ</i> containing the entire <i>azu</i> gene lack the N-terminal signal peptide and the 3x <i>flag</i> sequence; Tc <sup>r</sup> | This study |
| mini-CTX- <i>tssA2</i> -Flag            | Expression plasmid, mini-CTX- <i>lacZ</i> containing the entire <i>tssA2</i> gene and the 3x <i>flag</i> sequence; Tc <sup>r</sup>                                  | This study |
| mini-CTX- <i>PA0943</i> -Flag           | Expression plasmid, mini-CTX- <i>lacZ</i> containing the entire <i>PA0943</i> gene and the 3x <i>flag</i> sequence; Tc <sup>r</sup>                                 | This study |
| mini-CTX- <i>xcpP</i> -Flag             | Expression plasmid, mini-CTX- <i>lacZ</i> containing the entire <i>xcpP</i> gene and the 3x <i>flag</i> sequence; Tc <sup>r</sup>                                   | This study |
| mini-CTX- <i>ctpA</i> -Flag             | Expression plasmid, mini-CTX- <i>lacZ</i> containing the entire <i>ctpA</i> gene and the 3x <i>flag</i> sequence; Tc <sup>r</sup>                                   | This study |
| mini-CTX- <i>lacZ-clpV2-sfGFP</i>       | Expression plasmid, mini-CTX- <i>lacZ</i> containing the entire <i>clpV2</i> gene fused with <i>sfGFP</i> sequence; Tc <sup>r</sup>                                 | This study |
| pMMB67H- <i>vgrG2b</i> -Flag            | Expression plasmid, pMMB67H containing the entire <i>vgrG2b</i> gene and the 3x <i>flag</i> sequence; Ap <sup>r</sup> , Cb <sup>r</sup>                             | This study |
| pMMB67H- <i>pldA</i> -Flag              | Expression plasmid, pMMB67H containing the entire <i>pldA</i> gene and the 3x <i>flag</i> sequence; Ap <sup>r</sup> , Cb <sup>r</sup>                               | This study |
| pMMB67H- <i>oprC</i> -His <sub>6</sub>  | Expression plasmid, pMMB67H containing the entire <i>oprC</i> gene and the 3x his sequence; Ap <sup>r</sup> , Cb <sup>r</sup>                                       | This study |
| pAK- <i>clpV2</i>                       | pAK1900 with the entire <i>clpV2</i> gene; Ap <sup>r</sup>                                                                                                          | This study |
| pAK- <i>clpV2<sub>2E</sub></i>          | pAK1900 with the site-directed mutant <i>clpV2</i> gene; Ap <sup>r</sup>                                                                                            | This study |
| pAK- <i>hcp2</i>                        | pAK1900 with the entire <i>hcp2</i> gene; Ap <sup>r</sup>                                                                                                           | This study |

|                      |                                                            |            |
|----------------------|------------------------------------------------------------|------------|
| pAK- <i>tssM2</i>    | pAK1900 with the entire <i>tssM2</i> gene; Ap <sup>r</sup> | This study |
| pAK- <i>cueR</i>     | pAK1900 with the entire <i>cueR</i> gene; Ap <sup>r</sup>  | This study |
| pAK- <i>azu</i>      | pAK1900 with the entire <i>azu</i> gene; Ap <sup>r</sup>   | This study |
| pUCp26- <i>retS</i>  | pUCp26 with the entire <i>retS</i> gene; Tc <sup>r</sup>   | This lab   |
| pUCp26- <i>clpV2</i> | pUCp26 with the entire <i>clpV2</i> gene; Tc <sup>r</sup>  | This study |

## Reference

1. Hoang, T.T., Karkhoff-Schweizer, R.R., Kutchma, A.J. & Schweizer, H.P. A broad-host-range Flp-FRT recombination system for site-specific excision of chromosomally-located DNA sequences: application for isolation of unmarked *Pseudomonas aeruginosa* mutants. *Gene* 212, 77-86 (1998).
2. Poole, K., Neshat, S., Krebs, K. & Heinrichs, D.E. Cloning and nucleotide sequence analysis of the ferripyoverdine receptor gene *fpvA* of *Pseudomonas aeruginosa*. *J Bacteriol* 175, 4597-604 (1993).
3. Becher, A. & Schweizer, H.P. Integration-proficient *Pseudomonas aeruginosa* vectors for isolation of single-copy chromosomal *lacZ* and *lux* gene fusions. *BioTechniques* 29, 948-953 (2000).
4. Furste JP, Pansegrau W, Frank R, Blocker H, Scholz P, Bagdasarian M, Lanka E (1986) Molecular cloning of the plasmid RP4 primase region in a multi-host-range *tacP* expression vector. *Gene* 48: 119-131.
5. West SE, Schweizer HP, Dall C, Sample AK, Runyen-Janecky LJ (1994) Construction of improved *Escherichia-Pseudomonas* shuttle vectors derived from pUC18/19 and sequence of the region required for their replication in *Pseudomonas aeruginosa*. *Gene* 148: 81-86.
