# Supplementary material for: A Pseudomonas aeruginosa type VI secretion system regulated by CueR facilitates copper acquisition
Source: PubMed Central journal article supplement (PMC6907878; doi:10.1371/journal.ppat.1008198), 2019-12-02
Supplement: ppat.1008198.s004.pdf [file ppat.1008198.s004.pdf]

**S4 Table.** Primers used in this study.

| Primer                     | Sequence (5'→3') <sup>a</sup>   | Application                                   |
|----------------------------|---------------------------------|-----------------------------------------------|
| pEX- <i>clpV1</i> -up-S    | ATAgaattcGACCGGGTCAACGAGCATCA   | Constructing <i>clpV1</i><br>deletion mutant  |
| pEX- <i>clpV1</i> -up-A    | GACTctagaCTTGCAGAATACCGTGGCGG   |                                               |
| pEX- <i>clpV1</i> -down-S  | TATtctagaCCTCACCCGCATGCTCGAAG   | Constructing <i>clpV2</i><br>deletion mutant  |
| pEX- <i>clpV1</i> -down-A  | TATAagcttGAATTGAGGTTCGAGGCGGCC  |                                               |
| pEX- <i>clpV2</i> -up-S    | TACggatccCATCCAGCGCCTGCACCCGA   |                                               |
| pEX- <i>clpV2</i> -up-A    | CGTtctagaTTCGAGGTCGCGCCGGGTGT   |                                               |
| pEX- <i>clpV2</i> -down-S  | TATtctagaTTTGCTGGAAGCGATGGCGC   | Constructing <i>clpV3</i><br>deletion mutant  |
| pEX- <i>clpV2</i> -down-A  | TATAagcttGCGATCGGGAATCGCCCAAT   |                                               |
| pEX- <i>clpV3</i> -up-S    | TTAgaattcCATTTGCAGGCGGAAGACTT   |                                               |
| pEX- <i>clpV3</i> -up-A    | TCCtctagaTAATGATGGGTGCGTTGCAG   |                                               |
| pEX- <i>clpV3</i> -down-S  | TATtctagaGCCGTGCTCGCCAAGTGCAG   | Constructing <i>retS</i><br>deletion mutant   |
| pEX- <i>clpV3</i> -down-A  | AATAagcttCGTCGTCATGCCCGCTGAGG   |                                               |
| pEX- <i>retS</i> -up-S     | TTAggtaccGGGCTGGGACTTCAAGCGGG   |                                               |
| pEX- <i>retS</i> -up-A     | GGCtctagaGATCCGAAGCCGTACCACGG   |                                               |
| pEX- <i>retS</i> -down-S   | TATtctagaGGCGACGCCCTGCCCTCCTG   | Constructing <i>hcp2</i><br>deletion mutant   |
| pEX- <i>retS</i> -down-A   | TATAagcttCGCCGCCGTCCTCGCTCATC   |                                               |
| pEX- <i>hcp2</i> -up-S     | TATggatccCCTGGTGCTCCCCGGCGTAG   |                                               |
| pEX- <i>hcp2</i> -up-A     | CGCtctagaCCTCCGGCTCCGACGACTGG   |                                               |
| pEX- <i>hcp2</i> -down-S   | ATAtctagaCTTGGTGCCGGTGATGGACA   | Constructing <i>tssM2</i><br>deletion mutant  |
| pEX- <i>hcp2</i> -down-A   | TATAagcttCATCCGGTGCTGACGATCGA   |                                               |
| pEX- <i>tssM2</i> -up-S    | TTAcccgggCAATACCTCGAACGTGCC     |                                               |
| pEX- <i>tssM2</i> -up-A    | GCCtctagaCATTTTCGCGTCCCTGTGT    |                                               |
| pEX- <i>tssM2</i> -down-S  | GCCtctagaCTCTGATGCAACGCACCG     | Constructing <i>vgrG2a</i><br>deletion mutant |
| pEX- <i>tssM2</i> -down-A  | ATTAagcttACGGTGCCAGCGGCGCAC     |                                               |
| pEX- <i>vgrG2a</i> -up-S   | TATgaattcGATCAACCCTGGCTGCCAGT   |                                               |
| pEX- <i>vgrG2a</i> -up-A   | CAGtctagaGCGACACGGAGTCCAACACA   |                                               |
| pEX- <i>vgrG2a</i> -down-S | TAAtctagaGAGTTTCCCTTCGCCGACGA   | Constructing <i>vgrG2b</i><br>deletion mutant |
| pEX- <i>vgrG2a</i> -down-A | TATAagcttCGGCAACGTGTTTCAGGGTGA  |                                               |
| pEX- <i>vgrG2b</i> -up-S   | ATAggatccGTGACGGCTCCGTCGAAATC   |                                               |
| pEX- <i>vgrG2b</i> -up-A   | TCGtctagaAGCAGGTTTCGCTGGCGTACT  |                                               |
| pEX- <i>vgrG2b</i> -down-S | TCAtctagaGAGTTTCCCTTCGCCGACGA   | Constructing <i>cueR</i><br>deletion mutant   |
| pEX- <i>vgrG2b</i> -down-A | TCTAagcttTCTCATGGGTGCATGGTGGG   |                                               |
| pEX- <i>cueR</i> -up-S     | TTAgaattcGCTCACCCCGGTGCTGCT     |                                               |
| pEX- <i>cueR</i> -up-A     | CCCTctagaCGCTTCACCGATGTTTCAT    |                                               |
| pEX- <i>cueR</i> -down-S   | ATGtctagaGCGTCTGGCTGCTGCCAC     | Constructing <i>oprC</i><br>deletion mutant   |
| pEX- <i>cueR</i> -down-A   | ATTAagcttCGCTTTCCTGATCCGCCAGA   |                                               |
| pEX- <i>oprC</i> -up-S     | TATgaattcGAGAAGTGAGCAACGCGGCG   |                                               |
| pEX- <i>oprC</i> -up-A     | CGAtctagaCTGAACCTTCAACGAGGCC    |                                               |
| pEX- <i>oprC</i> -down-S   | TAAtctagaCATGATCTATGTGACTTCCGCC | Constructing <i>auz</i><br>deletion mutant    |
| pEX- <i>oprC</i> -down-A   | TATctgacgCGATGTCGGAGAAGTCCAGTTG |                                               |
| pEX- <i>auz</i> -up-S      | ACTgaattcCCTAACGGGAGCCCGAACAT   |                                               |
| pEX- <i>auz</i> -up-A      | CTGtctagaACCCTGAAGTGATGCGCGAG   |                                               |

|                                               |                                  |                           |
|-----------------------------------------------|----------------------------------|---------------------------|
| pEX- <i>auz</i> -down-S                       | GTGtctagaCGTAGCATGGAGCAGCCTCCT   |                           |
| pEX- <i>auz</i> -down-A                       | CAGaagcttAGCCGCCGGTGGACG         |                           |
| pET- <i>oprC</i> -S                           | TATggatccATGGAAAACGTATGTCTACTCA  | Protein cloning           |
| pET- <i>oprC</i> -A                           | TATctcgagTCAGAAGCTGAAGTCGACCTTGG |                           |
| pGEX6p-1- <i>auz</i> -S                       | GTAggatccATGCTACGTAAACTCGCTGCG   | Protein cloning           |
| pGEX6p-1- <i>auz</i> -A                       | GATctcgagTCACTTCAGGGTCAGGGTGCC   |                           |
| pGEX6p-1- <i>cueR</i> -S                      | ATAggatccATGAACATCGGTGAAGCGG     | Protein cloning           |
| pGEX6p-1- <i>cueR</i> -A                      | ATAgtcgacTCAGTGGCAGCAGCCAGAC     |                           |
| pAK- <i>clpV2</i> -S                          | TATtctagaGGGGTATGTGGGGATGCTGGAT  | Constructing <i>clpV2</i> |
| pAK- <i>clpV2</i> -overlap-A                  | TACGTTGATCATGCTCATCCTAACCCTTCA   | complemented              |
| pAK- <i>clpV2</i> -overlap-S                  | CATTGAAGGGTTAGGATGAGCATGATCAA    | plasmid                   |
| pAK- <i>clpV2</i> -A                          | CATAagcttTGCGGTACGCGGCTGAACAT    |                           |
| pAK- <i>hcp2</i> -S                           | TTAtctagaTGTACGACCGGTGTGCCTGT    | Constructing <i>hcp2</i>  |
| pAK- <i>hcp2</i> -A                           | ACTaagcttACCTGATCGGCAGCTGGATC    | complemented<br>plasmid   |
| pAK- <i>tssM2</i> -S                          | TTAtctagaATGCCTGGATGGCAGCGG      | Constructing <i>tssM2</i> |
| pAK- <i>tssM2</i> -overlap-A                  | GAAGAAGTTTTTCATCGAGTGGCTGAGTTC   | complemented              |
| pAK- <i>tssM2</i> -overlap-S                  | GAAGAAAGTCGGCG                   | plasmid                   |
| pAK- <i>tssM2</i> -A                          | ATCaagcttAGGGCTCGGTGCGTTGCATCAGA |                           |
| pAK- <i>cueR</i> -S                           | TAAggatccGATCGTCAAGCGCATCGTCG    | Constructing <i>cueR</i>  |
| pAK- <i>cueR</i> -A                           | TCAaagcttCTGGCCGCTGCTGGATATCA    | complemented<br>plasmid   |
| pAK- <i>auz</i> -S                            | ATAtctagaGATCGACTCCTGTCTGGGGG    | Constructing <i>auz</i>   |
| pAK- <i>auz</i> -A                            | TATAagcttTCACTTCAGGGTCAGGGTGCC   | complemented<br>plasmid   |
| Mini- <i>oprC</i> -S                          | ATAgaattcAGGCAGGCGTGTTGGCGG      | Constructing <i>oprC</i>  |
| Mini- <i>oprC</i> -overlap-A                  | CTGCGACTCCCGCCGTC                | complemented              |
| Mini- <i>oprC</i> -overlap-S                  | GACGGCGGGAGTCGCAGATGGAAAACGT     | plasmid &                 |
| Mini- <i>oprC</i> -A                          | ATGTCTACTCAAC                    | Western-blot              |
| Mini- <i>oprC</i> -flag-A                     | TATctcgagTCAGAAGCTGAAGTCGACCTTGG |                           |
| Mini- <i>hcp2</i> -flag-S                     | TATgaattcGAAGCTGAAGTCGACCTTGGTCC | Western-blot              |
| Mini- <i>hcp2</i> -flag-A                     | TATctcgagGCCTTGGCCGAAAGGCTA      |                           |
| Mini- <i>auz</i> -flag-S                      | TATgaattcCCCTGCCACCGGCGA         | Western-blot              |
| Mini- <i>auz<sub>ss</sub></i> -flag-overlap-A | ATActcgagGATCGACTCCTGTCTGGGG     |                           |
| Mini- <i>auz<sub>ss</sub></i> -flag-overlap-S | CATGGAGCAGCCTCCTA                |                           |
| Mini- <i>auz</i> -flag-A                      | TAGGAGGCTGCTCCATGCCGAGTCTCGGT    |                           |
| Mini- <i>tssA2</i> -flag-S                    | TATgaattcCTTCAGGGTCAGGGTGCC      | Western-blot              |
| Mini- <i>tssA2</i> -flag-A                    | TATgtcgacGGGAGCTTCGATCAGCG       |                           |
| Mini- <i>xcpP</i> -S                          | TATAagcttTTCGAGCACCACCTCGAGATC   | Western-blot              |
| Mini- <i>xcpP</i> -A                          | CGGggtaccCAGCCAGTACTGCTCCTCCAG   |                           |
| Mini- <i>PA0943</i> -S                        | CCCaagcttGTCGCTTTCGGTAGGCGTG     | Western-blot              |
| Mini- <i>PA0943</i> -overlap-A                | CGGggtaccAGCAGGGTCTGCAGGGCT      |                           |
|                                               | AAATCCAGGCCTATAGGGGTAAT          | Western-blot              |

|                            |                                                   |                              |
|----------------------------|---------------------------------------------------|------------------------------|
| Mini-PA0943-overlap-S      | AATTACCCCTATAGGCCTGGATTTATGCGTA<br>AAGCCATGCTGTTC |                              |
| Mini-PA0943-A              | CCCaaagcttGCTCTTTTCGCCAGTGACGG                    |                              |
| Mini-ctpA-S                | CGGggtaccCGCTGCTGATGCTGTTTCGC                     | Western-blot                 |
| Mini-cptA-overlap-A        | GGGGTGGCGGGCACCTGG                                |                              |
| Mini-cptA-overlap-S        | CCAGGTGCCCGCCACCCCATGCTGCATTGC<br>TTCCGTCC        |                              |
| Mini-cptA-A                | CCCaaagcttGTTGCCGCGGGTGACGCT                      |                              |
| Mini-clpV2-sfGFP-S         | CCCaaagcttGGTATGTGGGGATGCTGGAT                    | Fluorescence<br>microscopy & |
| Mini-clpV2-sfGFP-overlap-A | AACAGTTCTTCACCTTTACAGGCCAACTCG<br>CAGAG           | Western-blot                 |
| Mini-clpV2-sfGFP-overlap-S | CTCTGCGAGTTCGCCTCTAAAGGTGAAGA<br>ACTGTT           |                              |
| Mini-clpV2-sfGFP-flag-A    | AGTgaattcTTATTTGTAGAGCTCATCCATGC                  |                              |
| pMMB67H-vgrG2b-flag-S      | CCGgaattcATGCGTCAAAGGGACCTGAA                     | Western-blot                 |
| pMMB67H-vgrG2b-flag-A      | CCCaaagcttGTATCCCGTTGGGAAGTTTTTC                  |                              |
| pMMB67H-pldA-flag-S        | ATAgaattcATGTTGCAGAAGAAGCCCTACAA                  | Western-blot                 |
| pMMB67H-pldA-flag-A        | TATAagcttTGTGCGATGCTTTCCTTGTGC                    |                              |
| pMMB67H-oprC-<br>His-S     | CGCgaattcATGGAAAAACGTATGTCT                       | Co-IP                        |
| pMMB67H-oprC-<br>His-A     | AATAagcttTCAGTGATGATGATGATGATGGAA<br>GCTGAAGTCGAC |                              |
| clpV2 <sup>E286A</sup> -S  | ACCATCCTGTTCATCGACGCGGCCCATACG<br>CTGAT           | Mutagenesis                  |
| clpV2 <sup>E286A</sup> -A  | ATCAGCGTATGGGCCGCGTCGATGAACAGG<br>ATGGT           |                              |
| clpV2 <sup>E692A</sup> -S  | TTCGGTGATATTGCTGGACGCGGTGGAGAA<br>GGCCGATC        |                              |
| clpV2 <sup>E692A</sup> -A  | GATCGGCCTTCTCCACCGCGTCCAGCAATA<br>TCACCGAA        |                              |
| qRT-rpsL-S                 | GTAAGGTATGCCGTGTACG                               | For qRT PCR                  |
| qRT-rpsL-A                 | CACTACGCTGTGCTCTTG                                |                              |
| qRT-oprC-S                 | CGCAGTCCGACGATTACGA                               |                              |
| qRT-oprC-A                 | GGCGGTGAGTTCGATCAGG                               |                              |
| qRT-azu-S                  | TGTCGTCGGGCTTCAGG                                 |                              |
| qRT-azu-A                  | CAACACCAATGCCATCACC                               |                              |
| qRT-clpV2-S                | GATCCGTGGCCAGGAAC                                 |                              |
| qRT-clpV2-A                | CACCAGCAGGAACACGC                                 |                              |
| qRT-hcp2-S                 | CACTACTACACCACCGTCCT                              |                              |
| qRT-hcp2-A                 | GTGGGTCCAGGTGATCTTGC                              |                              |
| qRT-tssA2-S                | CCCATCGAGTCCATGCC                                 |                              |
| qRT-tssA2-A                | CGCTGATCCAGCCACGGG                                |                              |
| qRT-tssF2-S                | GGTGGGGTTCGCCGAAGA                                |                              |
| qRT-tssF2-A                | GCTGTATTTCGGCCGGCAT                               |                              |

|                         |                         |               |
|-------------------------|-------------------------|---------------|
| <i>qRT-hcp1-S</i>       | CCAAGTACATCGACAAGT      |               |
| <i>qRT-hcp1-A</i>       | TTCCTTCAGGGTGATGAT      |               |
| <i>qRT-hcp3-S</i>       | AAGGCGACAGCCTGCTCG      |               |
| <i>qRT-hcp3-A</i>       | CAACTGGTTGGCGGCCAG      |               |
| <i>phcp2-gf-S</i>       | GCCTTGGCCGAAAGGCTA      | For gel-shift |
| <i>phcp2(208)-gf-S</i>  | TCCGAGAGAGTGCGCAACTTT   |               |
| <i>phcp2(158)-gf-S</i>  | TTTTTCAGTGTTCTTCCCATGAG |               |
| <i>phcp2-gf-A</i>       | GGATACGTTCTTGTCGTTGAAAG |               |
| <i>ptssA2-gf-S</i>      | GGACCGCCCATCTCGATT      |               |
| <i>ptssA2(173)-gf-S</i> | AATAGGAAAATTCCCAAAGA    |               |
| <i>ptssA2(139)-gf-S</i> | GCTTGCCAGTTTTTATGTTG    |               |
| <i>ptssA2-gf-A</i>      | CCTAACCCCTTCAATGCACACC  |               |
| <i>poprC-gf-S</i>       | AGGCAGGCGTGTTGGCGG      |               |
| <i>poprC-gf-A</i>       | CTGCGACTCCCGCCGTCT      |               |
| <i>p1374-gf-S</i>       | GACCTTCGCCGATGCCGA      |               |
| <i>p1374-gr-A</i>       | AGCCGGTAGCTCGCTCCG      |               |

---

<sup>a</sup> Restriction sites displayed in lowercase.
